# Supplementary material
Source: PubMed Central journal article supplement (PMC4908968)

Supplementary Figure 1 – Uncropped scans with size marker indications

Figure 1c

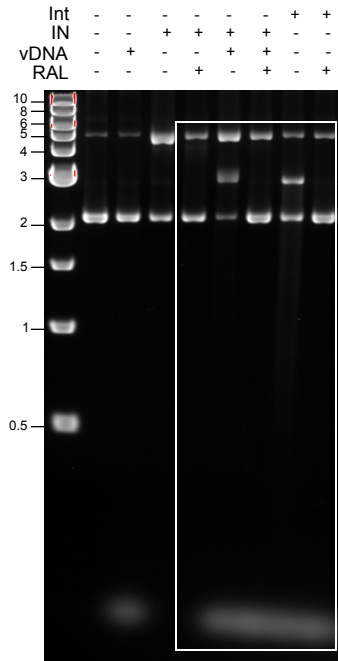

Figure 4b

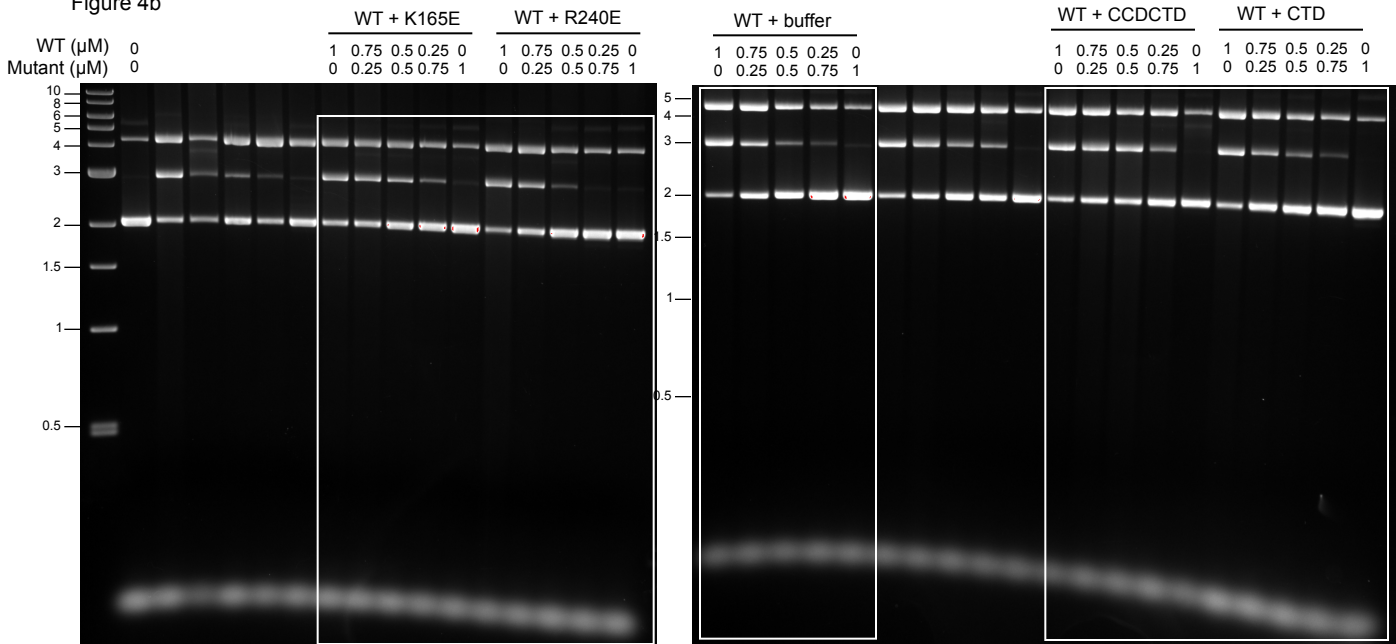

Supplement: NIHMS748595-supplement-supp_fig1.pdf [file NIHMS748595-supplement-supp_fig1.pdf]
